1                   **The Influence of Pesticide Use on Amphibian Chytrid Fungal Infections**  
2                                           **Varies with Host Life Stage**

3  
4                                           Samantha L. Rumschlag<sup>a\*</sup> and Jason R. Rohr<sup>a,b</sup>

5                   <sup>a</sup>Department of Integrative Biology, University of South Florida, Tampa, FL, USA

6                                           <sup>b</sup>[jasonrohr@gmail.com](mailto:jasonrohr@gmail.com)

7                                           \*corresponding author: [rumschsl@gmail.com](mailto:rumschsl@gmail.com)

8    Keywords: *Batrachochytrium dendrobatidis*, disease distributions, pesticides, herbicides,  
9    wildlife diseases, host-pathogen interactions

10   Running Title: Pesticide Use Determines Infection Risk

11   Words in Abstract: 300

12   Words in Main Body: 3874

13   Number of References: 43

14

15 ABSTRACT

16 **Aim** Pesticides are widespread and may alter host-pathogen interactions, ultimately influencing  
17 pathogen distributions across landscapes. Previous laboratory research supports two hypotheses  
18 regarding the effects of pesticides on interactions between amphibians and the predominately  
19 aquatic fungal pathogen *Batrachochytrium dendrobatidis* (Bd): 1) pesticides can be directly toxic  
20 to Bd reducing infection risk of aquatic larval amphibians, and 2) exposure to pesticides at  
21 formative stages of amphibian development can have long-term consequences on defenses,  
22 increasing disease risk after metamorphosis. It remains equivocal whether these laboratory  
23 patterns are consistent across amphibian species and occur in the field across broad spatial  
24 scales. The aim of this research is to address this research gap on the impact of pesticides on Bd  
25 distributions.

26 **Location** Contiguous United States.

27 **Time Period** 1998-2009.

28 **Major Taxa Studied** Amphibian hosts and Bd.

29 **Methods** Our data included 3,946 individuals evaluated for Bd infection across 49 amphibian  
30 species, at 126 locations, which resulted in 199 estimates of Bd prevalence in populations. We  
31 used species distribution models and multimodel inference to assess the influence of 1) total  
32 pesticide use, 2) pesticide use by type (herbicide, insecticide, fungicide), and 3) the most  
33 commonly used pesticide compounds on Bd infection prevalence in amphibian populations  
34 across life stages, controlling for several factors previously documented to affect Bd's  
35 distribution.

36 **Results** Consistent with laboratory findings, our results indicate that exposure to multiple  
37 herbicide compounds is associated with lowered infection risk in the aquatic larval stage but  
38 higher risk in the terrestrial post-metamorphic stage.

39 **Main Conclusions** Our study highlights the complex nature of the effects that pesticides can  
40 have on disease distributions and suggests that pesticides should be strongly considered at broad  
41 scales and across host species, especially in environments in which exposure is widespread.  
42 Accurate predictions of disease distributions may lead to more effective management strategies  
43 to limit disease spread.

44

45 INTRODUCTION

46 The emergence of infectious diseases threatens public health, global economies, and  
47 wildlife populations (Binder, 1999; Daszak *et al.*, 2000; Morens *et al.*, 2004). Therefore,  
48 understanding factors that determine distributions of infectious diseases is critical if we are to  
49 design effective management strategies to limit disease spread. Anthropogenic activities are  
50 predicted to be major determinants of infectious disease distributions (Daszak *et al.*, 2001; Jones  
51 *et al.*, 2008). While mounting evidence suggests that changes to climate and land use type can  
52 influence distributions of disease (Lafferty, 2009; Rohr *et al.*, 2011; Martin & Boruta, 2013), the  
53 influence of chemical contaminants on disease distributions remains relatively undetermined  
54 (Lawler *et al.*, 2006). For wildlife populations in freshwater ecosystems, chemical contaminants,  
55 including pesticides, are a widespread abiotic factor that might influence the distributions of  
56 disease occurrence by affecting host-pathogen interactions. Pesticides can have simultaneous  
57 positive and negative effects on parasite transmission; the net effect of these factors determines  
58 the influence of pesticides on disease risk in wildlife populations (Rohr *et al.*, 2008a). For  
59 instance, pesticides can increase the incidence of pathogen infection (Christin *et al.*, 2003; Pettis  
60 *et al.*, 2012) via the disruption of host immune systems (Blakley *et al.*, 1999; Rohr *et al.*, 2008b).  
61 Alternatively, exposure to pesticides can also decrease pathogen viability via direct negative  
62 effects of pesticides on pathogen survival and reproduction (Lafferty & Kuris, 1999; Morley *et*  
63 *al.*, 2003), pointing to the complex nature of effects of pesticides on host-pathogen interactions.

64 For hosts with complex life cycles, host life stage could determine the net effects of  
65 pesticides on disease risk if the relative balance between the effects of pesticides on host  
66 susceptibility and pathogen viability changes throughout the development of the host. If the net  
67 effect of pesticides changes with host life stage, we might expect pesticides to be negatively

68 associated with infections for stages in which the negative effects of pesticides are greater on  
69 pathogen viability compared to host immunity. Alternatively, we might expect a positive  
70 association between pesticides and infection prevalence for host stages in which the negative  
71 impact of pesticides is greater on host immunity compared to pathogen viability.

72         Understanding the influence of pesticides on disease dynamics in amphibian populations  
73 at broad spatial scales is markedly important because amphibians are facing global declines that  
74 are caused, in part, by a fungal pathogen, *Batrachochytrium dendrobatidis* (hereafter, Bd) that  
75 causes the disease chytridiomycosis. Bd has been linked to population declines, mass mortality,  
76 and species extinctions in hosts (Lips *et al.*, 2006; Skerratt *et al.*, 2007), and its effects on hosts  
77 can be altered by environmental conditions, including pesticide exposure, that may influence  
78 pathogen viability or host immune response (Gaietto *et al.* 2014, Wise *et al.* 2014). Although the  
79 presence of Bd in North America dates back to 1888 (Talley *et al.*, 2015), we lack an  
80 understanding of variation in host susceptibility across environmental gradients and the role  
81 pesticides might play in mediating the occurrence of Bd.

82         Experimental evidence suggests that pesticide exposure during critical developmental  
83 windows in early-life can have effects on the immune system in adult stages (Rohr & Palmer,  
84 2005, 2013; Rohr *et al.*, 2006) and that there are differential effects of pesticide exposure on  
85 amphibian-Bd interactions over aquatic larval and terrestrial post-metamorphic life stages. For  
86 instance, in the aquatic larval life stage of amphibians, pesticides can have direct negative effects  
87 on Bd, which results in an overall decreased risk of disease for aquatic larvae. In fact, Bd growth  
88 on infected tadpoles can be reduced by pesticide exposure (McMahon *et al.*, 2013) and can even  
89 result in clearance of Bd from the host (Hanlon *et al.*, 2012). These negative effects of pesticides  
90 on Bd are likely driven by reduced Bd growth and production of Bd zoospores, the aquatic

91 infective stage of the pathogen (Hanlon *et al.*, 2012; McMahon *et al.*, 2013). Bd infects  
92 keratinized cells in amphibians, which occur only in the mouthparts of tadpoles (Voyles *et al.*,  
93 2011), suggesting that susceptibility to Bd infection is low in this early-life stage. As tadpoles  
94 metamorphose into the terrestrial life stage, the incidence of keratinized cells increases as the  
95 epidermis develops and Bd infection can move from the mouthparts of the tadpole to the entire  
96 surface of the body (McMahon & Rohr, 2015), suggesting that susceptibility to infection and  
97 disease development increases in the terrestrial host life stage (Rachowicz & Vredenburg, 2004).  
98 In the terrestrial post-metamorphic life stage, pesticide exposure during early-life is associated  
99 with increased Bd-induced mortality, which may be driven by disruption of the immune system.  
100 For example, early-life pesticide exposures can lead to increased Bd-induced mortality of  
101 terrestrial hosts, which is caused by reduced tolerance to infection; this finding points to a cost of  
102 pesticide exposure that could be induced by disruption of the immune system (Rohr *et al.*, 2013).  
103 While these experimental studies support differential effects of pesticide exposure on amphibian-  
104 Bd interactions over aquatic larval and terrestrial post-metamorphic life stages, it remains  
105 equivocal whether these laboratory patterns are consistent across amphibian species and occur in  
106 natural populations at broad spatial scales.

107         The objective of the current study is to evaluate the influence of pesticide use on Bd  
108 infection prevalence in amphibian populations across the United States. We used publically  
109 available data including 199 field observations of Bd infection prevalence and corresponding  
110 estimates of pesticide use at the county level. We used species distribution models and  
111 multimodel inference approaches to assess the influence of 1) total pesticide use, 2) pesticide use  
112 by type (herbicide use, insecticide use, fungicide use) and 3) the most commonly used pesticide  
113 compounds within type on Bd infection prevalence in amphibian populations across life stages

114 controlling for the influence of environmental (vegetation, precipitation, temperature) and biotic  
115 (host family) factors. Based on the experimental evidence reviewed previously concerning  
116 persistent and life-stage dependent effects of pesticides on Bd infection risk in amphibians, we  
117 predicted that in the aquatic larval stage of amphibians, Bd prevalence would be negatively  
118 associated with pesticide use, and in the terrestrial post-metamorphic stage, Bd prevalence would  
119 be positively associated with pesticide use.

120

## 121 METHODS

### 122 *Response and Predictor Variables*

123 We obtained a spatially explicit dataset of amphibian populations surveyed for Bd infection  
124 from Bd Maps ([www.bd-maps.net](http://www.bd-maps.net)) in 2013. Bd survey sites were included in our analyses if five  
125 or more individuals were surveyed at a given site between 1992 and 2012, life stage information  
126 of amphibians was provided, and survey sites were located in the contiguous USA. The resulting  
127 dataset comprised 3,946 individuals evaluated for Bd infection, across 49 species, at 126 unique  
128 locations, which resulted in 199 observations of Bd infection prevalence at the population level.  
129 Bd infection prevalence at each site, which served as the response variable in all of our statistical  
130 models, was arcsine-square-root transformed for each analysis.

131 To conservatively estimate pesticide use, we used USA county-level low pesticide use (as  
132 opposed to high) estimates from 1992 to 2012 obtained from the Estimated Annual Agricultural  
133 Pesticide Use dataset provided by the Pesticide National Synthesis Project of the National Water-  
134 Quality Assessment (NAWQA) Program (United States Geological Survey)  
135 (<https://water.usgs.gov/nawqa/pnsp/usage/maps/county-level/>). Preliminary analyses showed the  
136 effects of high pesticide use estimates were indistinguishable from low use estimates (data not

137 shown). We classified the pesticide compounds as herbicide, insecticide, or fungicide using the  
138 primary use type classifications provided by Pesticide Action Network (PAN) Pesticide Database  
139 (<http://www.pesticideinfo.org/>). We included plant growth regulators and defoliant as herbicides  
140 and insect growth regulators as insecticides. For a given site in a given county, we summed low  
141 use estimates across pesticide types at the county level. In statistical models, pesticide usages  
142 were transformed using the natural logarithm. We excluded mineral and biologic fungicides (e.g.  
143 bacteria) because we were interested in non-target effects of synthetic fungicides on host  
144 responses to Bd that might influence infection prevalence. To estimate local vegetative habitat,  
145 we used a seven-day composite from June 14 to 20 of 2002 of Normalized Difference Index  
146 (NDVI) data from eMODIS (Earth Resources Observation and Science Center, Moderate  
147 Resolution Imaging Spectroradiometer) made available by the United States Geological Survey  
148 (<https://earthexplorer.usgs.gov/>). Data for the following abiotic factors were downloaded from  
149 WorldClim (<http://www.worldclim.org/>): 30-y means (1960-1990) of annual total precipitation,  
150 precipitation of the wettest month, precipitation of the driest month, annual mean temperature,  
151 mean diurnal temperature range, maximum temperature of the warmest month, and minimum  
152 temperature of the coldest month. NDVI, precipitation, and temperature measures were extracted  
153 at survey site locations using ArcMap 10.4. We reduced our three precipitation measures and  
154 four temperature measures into a single precipitation measure and a single temperature measure  
155 using principal component analyses by extracting the first axis for precipitation measures (98.9%  
156 of the total variation, hereafter PC1Precip) and for temperature measures (83.8% of the total  
157 variation, hereafter PC1Temp).

158 *Generalized Least Squares Models*



159 Generalized least squares (GLS) multiple regression models were fit using the gls  
160 function (nlme package) with full maximum likelihood fit and an exponential spatial correlation  
161 structure. In all models, observations were weighted based on the number of individuals  
162 surveyed at a site. We constructed three sets of models to evaluate the influence of 1) total  
163 pesticide use, 2) pesticide use by type (herbicide use, insecticide use, fungicide use), and 3) the  
164 most commonly used herbicide compounds on Bd infection prevalence across host life stages.  
165 Models for total pesticide use and pesticide use by type included the following covariates to  
166 control for the effects of biotic and environmental factors: host family, NDVI, PC1Precip. and  
167 PC1Temp. To simplify models of pesticide compounds, we included host family and PC1Temp.  
168 as the only biotic and environmental covariates, as these covariates were relatively important in  
169 models of total pesticide use and pesticide use by type (relative importance score > 0.6, Figure  
170 1).

171 To evaluate the influence of total pesticide use across life stages of amphibian hosts on  
172 Bd infection prevalence, we constructed a model with predictor variables including: total  
173 pesticide use, host life stage, the interaction of life stage and pesticides, and all covariates. To  
174 evaluate which type of pesticide drove the effects of total pesticide use on Bd infection  
175 prevalence across life stages, we constructed a model with predictor variables including:  
176 herbicide use, insecticide use, fungicide use, host life stage, the two way interactions of host life  
177 stage with herbicide, insecticide, or fungicide use, and all covariates. When controlling for the  
178 effects of insecticide and fungicide use, herbicide use was the best predictor of Bd infection  
179 prevalence across host life stages. To determine which commonly used herbicide compounds  
180 drove the effects of herbicide use, we first gathered the use estimates for the top five most-used  
181 herbicide types in our dataset and constructed five models that included the following predictor

182 variables: herbicide compound (glyphosate, atrazine, metolachlor-s, ethephon, or sodium  
183 chlorate), herbicide use minus the compound of focus, insecticide use, fungicide use, host life  
184 stage, the interaction of host life stage and herbicide compound of focus, host family, and  
185 PCITemp. For use estimates at sites in which a compound estimate was not given, we assumed  
186 no use of that compound for the given site.

### 187 *Multimodel Inference and Comparisons of Goodness of Fit*

188 To avoid relying on a single model to draw conclusions about the importance of  
189 predictors on prevalence, we used multimodel inference (MuMin package), which fits models  
190 using combinations of predictors and ranks models by second-order Akaike Information Criteria  
191 corrected for small sample sizes (AICc) (dredge function), for models including total pesticide  
192 use and pesticide use by type. AICc,  $\Delta$ AICc, and Akaike weights for each candidate model were  
193 calculated. To compare the influence of model factors across all candidate models, Akaike  
194 weights for each factor were summed across models to determine relative importance scores  
195 (Burnham & Anderson, 2002). P-values were calculated from full model-averaged parameter  
196 estimates with statistical shrinkage. Nagelkerke pseudo  $R^2$  values were calculated to assess  
197 goodness-of-fit of the top performing models (with a  $\Delta$ AICc equal to zero). To visualize the  
198 effect of significant predictors on prevalence, we provide partial regression plots from these top  
199 performing models including total pesticide use and use by pesticide type.

200 To determine the relative contribution of each of the top five herbicide compounds to the  
201 patterns of total herbicide use on Bd prevalence across host life stages, we used a log-likelihood  
202 ratio test to compare the goodness-of-fit of two models: one that included the interaction between  
203 the focal herbicide compound and host life stage and one that did not. To visualize the influence  
204 of herbicide compounds on infection prevalence, we provide partial regression plots for each

205 herbicide compound and the sum of the most used herbicide compounds across host life stages  
206 controlling for covariates.

207

208 RESULTS

209 *The Influence of Total Pesticides*

210 Total pesticide use, life stage, family, and the interaction of pesticide use and life stage  
211 influenced Bd infection prevalence in amphibian populations significantly when controlling for  
212 covariates (Table 1, Fig. 1A, Nagelkerke pseudo  $R^2 = 0.39$ ). The relative importance scores for  
213 pesticide use, life stage, and the interaction of pesticide use and life stage were greater than all  
214 covariates, including host family, NDVI, precipitation, and temperature (Fig. 1A). In the best-  
215 fitting model controlling for covariates, the impact of pesticides depended on life stage (Table 1,  
216 Fig. 2A). For the aquatic larval life stage of the hosts, Bd infection prevalence decreased with  
217 increasing pesticide use, but for the terrestrial post metamorphic life stage of hosts, Bd infection  
218 prevalence increased with pesticide use (Fig. 2A).

219 *The Influence of Pesticide Use by Type*

220 While pesticide uses by type were positively correlated (herbicide use vs. insecticide use:  
221 Pearson's correlation coefficient = 0.77, herbicide use vs. fungicide use = 0.59, insecticide use  
222 vs. fungicide use = 0.82), the influence of total pesticide use on Bd infection prevalence across  
223 host life stages seemed to be driven by herbicide use in comparison with insecticide and  
224 fungicide use (Table 1). Herbicide use, life stage, family, and the interaction of herbicide use and  
225 life stage were significant predictors of prevalence, controlling for insecticide use, fungicide use,  
226 the interaction of insecticide and fungicide uses with life stage, and all other covariates (Table 1).  
227 The relative importance scores for herbicide use, life stage, and the interaction of herbicide use

228 and life stage were greater than all other factors in the model, including family, insecticide use,  
229 fungicide use, and the interaction of insecticide or fungicide use with life stage (Fig. 1B). Similar  
230 to the effect of total pesticide use, herbicide use was associated with decreased infection  
231 prevalence in the aquatic larval life stage and increased infection prevalence in the terrestrial  
232 post-metamorphic life stages (Fig. 2B, Nagelkerke pseudo  $R^2 = 0.37$ ).

### 233 *The Influence of Herbicide Compounds*

234 The five most commonly used herbicides in the dataset include glyphosate (34% of total  
235 herbicide use based on weight), atrazine (10%), metolachlor-s (5%), ethephon (5%), and sodium  
236 chlorate (5%). Including the interaction between focal herbicide compound and life stage  
237 improved the goodness of fit compared to the same model without this interactions for all five  
238 herbicides (glyphosate [log-likelihood ratio = 17.55,  $p < 0.001$ ], atrazine [log-likelihood ratio =  
239 8.97,  $p = 0.003$ ], metolachlor-s [log-likelihood ratio = 8.58,  $p = 0.003$ ], ethephon [log-likelihood  
240 ratio = 4.89,  $p = 0.027$ ], sodium chlorate [log-likelihood ratio = 6.09,  $p = 0.01$ ]). Similar to the  
241 effect of total pesticides and herbicides, glyphosate use was negatively associated with Bd  
242 prevalence in the aquatic stage and positively associated in the terrestrial stage (Fig. 3A). Both  
243 atrazine and metolachlor-s use were negatively associated with Bd prevalence in the larval stage  
244 but did not appear to be associated with infections in the terrestrial stage (Fig. 3B,C). In contrast,  
245 ethephon and sodium chlorate use did not have a strong influence on Bd prevalence in the  
246 aquatic larval stage, but were positively associated with Bd prevalence in the terrestrial post-  
247 metamorphic stage (Fig. 3D,E). The influence of the sum of the top five most-used herbicide  
248 compounds matches closely with the pattern of overall herbicide use on Bd prevalence (Fig. 3F).

249

250

## DISCUSSION

251 Pesticides represent a major ecological disturbance to communities in aquatic  
252 environments and can shape distributions of organisms across landscapes (Liess *et al.*, 2005;  
253 Schäfer *et al.*, 2007; Beketov *et al.*, 2013). Our study provides evidence of the influence of  
254 pesticides on infectious disease dynamics of wildlife at broad spatial scales, which is consistent  
255 with the body of experimental research on pesticides and amphibian-Bd interactions. We show a  
256 negative relationship between pesticide use and Bd infection prevalence in the aquatic larval life  
257 stage and a positive relationship between pesticide use and Bd infection prevalence in the  
258 terrestrial post-metamorphic life stage. Our analyses suggest that the combined influence of the  
259 most commonly used herbicides are the primary determinants of these differential effects of  
260 pesticides on infection prevalence across host life stages.

261 Hosts and pathogens in freshwater systems are likely exposed to pesticides in the aquatic  
262 environment, where the presence of contaminants, including pesticides, is common because of  
263 aerial deposition and agricultural runoff (Gilliom & Hamilton, 2006). In the amphibian-Bd  
264 system, when pesticides are present, the balance between hosts and pathogens in the aquatic  
265 environment is likely tipped in favor of hosts because of direct negative effects of pesticides on  
266 pathogen viability, which explains the mechanism for the observed negative association between  
267 pesticide use and infection prevalence in the aquatic larval stage of hosts in the current study.  
268 Several pesticides, including atrazine—the second most used herbicide compound in the United  
269 States and in our dataset, have been shown to have direct negative effects on Bd growth, survival  
270 (Hanlon & Parris, 2012; McMahon *et al.*, 2013), and production of zoospores, the aquatic  
271 infective stage of Bd (Hanlon & Parris, 2012).

272 However, as hosts develop, they can suffer delayed negative effects of early-life pesticide  
273 exposure well into adulthood, increasing their overall risk of disease development in the

274 terrestrial post-metamorphic life stage. Pesticide exposure can have delayed effects on organisms  
275 (Rohr & Palmer, 2005; Jones *et al.*, 2009) and can disrupt host-pathogen interactions leading to  
276 an increase in infectious disease risk (Rohr *et al.*, 2006; Rohr & McCoy, 2010; Wise *et al.*,  
277 2014). We propose that the observed positive effect of pesticide use, mainly driven by herbicide  
278 use, on Bd infection prevalence is consistent with the body of research showing persistent  
279 negative effects of early-life exposures to pesticides on infectious disease risk; for instance, post-  
280 metamorphic amphibians can suffer increased mortality to Bd as a result of early-life exposure to  
281 atrazine caused by reduced tolerance to infection, suggesting a long-term cost of pesticide  
282 exposure (Rohr *et al.*, 2013).

283         Interestingly, herbicides, as opposed to insecticides or fungicides, were most correlated  
284 with the observed patterns between pesticide use and infection prevalence. We suspect the power  
285 to detect an effect of herbicides is greater than that for insecticides or fungicides because  
286 herbicides are used in greater amounts in the United States (Grube *et al.*, 2011), increasing the  
287 likelihood of exposure in natural systems. In a given year, herbicides are used more than five  
288 times as much as insecticides or fungicides as measured by mass of active ingredient (Grube *et*  
289 *al.*, 2011). Herbicide exposure of natural host-pathogen populations is therefore more likely to  
290 occur in comparison with exposure to insecticides or fungicides.

291         Our results support that the combined effects of the most commonly used herbicides  
292 together drive the observed patterns of total herbicide use on infection prevalence. The  
293 association between individual herbicide compounds and infection prevalence across life stage  
294 either closely matched the overall pattern of total herbicide use (e.g. glyphosate) or showed a  
295 similar pattern to the influence of total herbicide use in at least one of the host life stages (e.g.  
296 atrazine, metolachlor-s, ethephon, sodium chlorate). For instance, atrazine and metolachlor-s

297 have negative effects on infection prevalence in the aquatic larval life stage but no strong effect  
298 in the terrestrial post-metamorphic life stage, and ethephon and sodium chlorate have positive  
299 effects on infection prevalence in the terrestrial post-metamorphic life stage but no strong effect  
300 in the aquatic larval life stage. The top five most commonly used herbicides in our dataset  
301 comprised about 59% of the total use of herbicides, so when we examine the influence of the  
302 sum of these herbicide compounds on infection prevalence across host life stages (Fig. 3F), it  
303 unsurprisingly closely matched the patterns for total herbicide use (Fig. 2B).

304 Our results suggest that managers could favor certain herbicide compounds over others if  
305 their goal is to limit increasing susceptibility to Bd infection in the terrestrial post-metamorphic  
306 stage. An understanding of non-target effects, including the role of potential herbicides on  
307 amphibian host fitness, would be needed to develop an integrated pest management solution.  
308 While our study evaluates the potential influence of pesticides on amphibian host resistance, via  
309 infection prevalence, we have not evaluated fitness consequences of pesticides on hosts exposed  
310 to parasites, which may occur through the physiological mechanisms of resistance or tolerance.  
311 For instance, herbicide exposure of Bd-infected or -exposed amphibian hosts may result in  
312 increased host mortality.

313 While we support that the combined uses of the most common herbicide compounds  
314 drive the influence of pesticide use on Bd infection prevalence in amphibians, we do not suggest  
315 that insecticides and fungicides do not contribute to this pattern. Instead, we highlight that  
316 herbicide, insecticide, and fungicide use are positively correlated at the county level across the  
317 United States. Since pesticide use estimates are derived at least in part from land use data (Thelin  
318 & Stone, 2013), counties in which herbicide use is high are likely counties with increased  
319 agricultural land use, so these counties also have high insecticide and fungicide use. The

320 influence of the most abundant pesticide type, namely herbicides, gives rise to the model that  
321 best predicts infection prevalence. Even though our models control for the use of other pesticide  
322 types when testing for a focal pesticide type, because of the positive correlation among the  
323 pesticide use types, we are hesitant to disregard a potential influence of insecticides and  
324 fungicides on Bd distributions.

325         Pesticides can be a major driver of communities in freshwater ecosystems (McMahon et  
326 al. 2012). Consistent with the body of experimental evidence in this system, our research  
327 illustrates how pesticides can shape distributions of infectious pathogens over broad spatial  
328 scales via effects that vary over the life span of a host, which highlights the complex nature of  
329 the impact of contaminants on natural systems. With their impacts on pathogen viability and host  
330 immunity, the effects of pesticides on infectious disease distributions should be given more  
331 attention particularly at broad scales and across host species. Accurate predictions of disease  
332 distributions may lead to the most effective management strategies to limit the spread of diseases  
333 to vulnerable populations.

334

335 ACKNOWLEDGMENTS.— Thank you to M. Venesky for providing the Bd dataset and to K.  
336 Ronnenberg and D. Olson for information regarding updates to the Bd dataset. We are grateful  
337 for the thoughtful advice of S. Koerner, J. Cohen, and M. Mahon on data management and  
338 analyses and to the many scientists who freely shared their data by contributing to the Bd-maps  
339 database. This manuscript was improved by the thoughtful feedback of the Rohr lab.

340

341

BIOSKETCH



342 Samantha Rumschlag ([samantharumschlag.weebly.com](http://samantharumschlag.weebly.com)) is currently a postdoctoral scholar in  
343 Jason Rohr's lab at the University of South Florida. Her research combines experimental  
344 manipulations with broad scale analyses to examine the influence of anthropogenic changes on  
345 wildlife populations and infectious diseases. The goal of her research is to inform wildlife  
346 management concerning current environmental issues to increase the likelihood of sustainable  
347 coexistence between humans and wildlife.

348

349

#### DATA ACCESSIBILITY

350 The derived dataset used for these analyses will be made publically available via Dryad upon  
351 manuscript acceptance.

352

REFERENCES

- 353
- 354 Barton, K. (2016) *MuMIn: Multi-model inference*. R package version 1.15.6.
- 355 Beketov, M.A., Kefford, B.J., Schafer, R.B. & Liess, M. (2013) Pesticides reduce regional  
356 biodiversity of stream invertebrates. *Proceedings of the National Academy of Sciences of*  
357 *the United States of America*, **110**, 11039–11043.
- 358 Binder, S. (1999) Emerging infectious diseases: Public health issues for the 21st century.  
359 *Science*, **284**, 1311–1313.
- 360 Blakley, B., Brousseau, P., Fournier, M. & Voccia, I. (1999) Immunotoxicity of pesticides: A  
361 review. *Toxicology and Industrial Health*, **15**, 119–132.
- 362 Burnham, K.P. & Anderson, D.R. (2002) *Model selection and multimodel inference: A practical*  
363 *information-theoretic approach*, 2nd ed. Springer Science & Business Media, New York.
- 364 Christin, M.S., Gendron, A.D., Brousseau, P., Ménard, L., Marcogliese, D.J., Cyr, D., Ruby, S.  
365 & Fournier, M. (2003) Effects of agricultural pesticides on the immune system of *Rana*  
366 *pipiens* and on its resistance to parasitic infection. *Environmental Toxicology and*  
367 *Chemistry*, **22**, 1127–1133.
- 368 Daszak, P., Cunningham, A.A. & Hyatt, A.D. (2001) Anthropogenic environmental change and  
369 the emergence of infectious diseases in wildlife. *Acta Tropica*, **78**, 103–116.
- 370 Daszak, P., Cunningham, A.A. & Hyatt, A.D. (2000) Emerging infectious diseases of wildlife -  
371 threats to biodiversity and human health. *Science*, **287**, 443–449.
- 372 Gaietto, K.M., Rumschlag, S.L. & Boone, M.D. (2014) Effects of pesticide exposure and the  
373 amphibian chytrid fungus on gray treefrog (*Hyla chrysoscelis*) metamorphosis.  
374 *Environmental Toxicology and Chemistry*, **33**, 2358–2362.
- 375 Gilliom, R.J. & Hamilton, P.A. (2006) *Pesticides in the nation's streams and ground water*,

- 376 *1992-2001-A summary*: U.S. Geological Survey Fact Sheet 2006-3028.
- 377 Grube, A., Donaldson, D., Kiely, T. & Wu, L. (2011) *Pesticides Industry Sales and Usage: 2006*  
378 *and 2007 Market Estimates*: U.S. Environmental Protection Agency.
- 379 Hanlon, S.M., Kerby, J.L. & Parris, M.J. (2012) Unlikely remedy: Fungicide clears infection  
380 from pathogenic fungus in larval southern leopard frogs (*Lithobates sphenoccephalus*). *PloS*  
381 *One*, **7**, e43573.
- 382 Hanlon, S.M. & Parris, M.J. (2012) The impact of pesticides on the pathogen *Batrachochytrium*  
383 *dendrobatidis* independent of potential hosts. *Archives of Environmental Contamination*  
384 *and Toxicology*, **63**, 137–143.
- 385 Jones, D.K., Hammond, J.I. & Relyea, R.A. (2009) Very highly toxic effects of endosulfan  
386 across nine species of tadpoles: Lag effects and family-level sensitivity. *Environmental*  
387 *Toxicology and Chemistry*, **28**, 1939–1945.
- 388 Jones, K., Patel, N., Levy, M., Storeygard, A., Balk, D., Gittleman, J. & Daszak, P. (2008)  
389 Global trends in emerging infectious diseases. *Nature*, **451**, 990–993.
- 390 Lafferty, K.D. (2009) The ecology of climate change and infectious diseases. *Ecology*, **90**, 888–  
391 900.
- 392 Lafferty, K.D. & Kuris, A.M. (1999) How environmental stress affects the impacts of parasites.  
393 *Limnology Oceanography*, **44**, 925–931.
- 394 Lawler, J.J., Aukema, J.E., Grant, J.B., Halpern, B.S., Kareiva, P., Nelson, C.R., Ohleth, K.,  
395 Olden, J.D., Schlaepfer, M.A., Silliman, B.R. & Zaradic, P. (2006) Conservation science: A  
396 20-year report card. *Frontiers in Ecology and the Environment*, **4**, 473–480.
- 397 Liess, M., Von, P.C. & Ohe, D. (2005) Analyzing effects of pesticides on invertebrate  
398 communities in streams. *Environmental Toxicology and Chemistry*, **24**, 954–965.

- 399 Lips, K.R., Brem, F., Brenes, R., Reeve, J.D., Alford, R.A., Voyles, J., Carey, C., Livo, L.,  
400 Pessier, A.P. & Collins, J.P. (2006) Emerging infectious disease and the loss of biodiversity  
401 in a Neotropical amphibian community. *Proceedings of the National Academy of Sciences*  
402 *of the United States of America*, **103**, 3165–70.
- 403 Martin, L.B. & Boruta, M. (2013) *The impacts of urbanization on avian disease transmission*  
404 *and emergence. Avian Urban Ecology: Behavioral and Physiological Adaptations* (ed. by  
405 D. Gil and H. Brumm), pp. 116–128. Oxford University Press, New York.
- 406 McMahon, T.A., Halstead, N.T., Johnson, S., Raffel, T.R., Romansic, J.M., Crumrine, P.W. &  
407 Rohr, J.R. (2012) Fungicide-induced declines of freshwater biodiversity modify ecosystem  
408 functions and services. *Ecology Letters*, **15**, 714–722.
- 409 McMahon, T.A. & Rohr, J.R. (2015) Transition of chytrid fungus infection from mouthparts to  
410 hind limbs during amphibian metamorphosis. *EcoHealth*, **12**, 188–193.
- 411 McMahon, T.A., Romansic, J.M. & Rohr, J.R. (2013) Nonmonotonic and monotonic effects of  
412 pesticides on the pathogenic fungus *Batrachochytrium dendrobatidis* in culture and on  
413 tadpoles. *Environmental Science and Technology*, **47**, 7958–7964.
- 414 Morens, D.M., Folkers, G.K. & Fauci, A.S. (2004) The challenge of emerging and re-emerging  
415 infectious diseases. *Nature*, **430**, 242–249.
- 416 Morley, N.J., Irwin, S.W.B. & Lewis, J.W. (2003) Pollution toxicity to the transmission of larval  
417 digeneans through their molluscan hosts. *Parasitology*, **126 Suppl**, S5–S26.
- 418 Pettis, J.S., Vanengelsdorp, D., Johnson, J. & Dively, G. (2012) Pesticide exposure in honey bees  
419 results in increased levels of the gut pathogen *Nosema*. *Naturwissenschaften*, **99**, 153–158.
- 420 Pineheiro, J., Bates, D., DebRoy, S., Sarkar, D., and R Core Team (2016). *nlme: Linear and*  
421 *nonlinear mixed effects models*. R package version 3.1-128.

- 422 Rachowicz, L.J. & Vredenburg, V.T. (2004) Transmission of *Batrachochytrium dendrobatidis*  
423 within and between amphibian life stages. *Diseases Of Aquatic Organisms*, **61**, 75–83.
- 424 Rohr, J.R., Dobson, A.P., Johnson, P.T.J., Kilpatrick, A.M., Paull, S.H., Raffel, T.R., Ruiz-  
425 Moreno, D. & Thomas, M.B. (2011) Frontiers in climate change-disease research. *Trends in*  
426 *Ecology and Evolution*, **26**, 270–277.
- 427 Rohr, J.R. & McCoy, K.A. (2010) A qualitative meta-analysis reveals consistent effects of  
428 atrazine on freshwater fish and amphibians. *Environmental Health Perspectives*, **118**, 20–  
429 32.
- 430 Rohr, J.R. & Palmer, B.D. (2005) Aquatic herbicide exposure increases salamander desiccation  
431 risk eight months later in a terrestrial environment. *Environmental Toxicology and*  
432 *Chemistry*, **24**, 34.
- 433 Rohr, J.R. & Palmer, B.D. (2013) Climate change, multiple stressors, and the decline of  
434 ectotherms. *Conservation Biology*, **27**, 741–751.
- 435 Rohr, J.R., Raffel, T.R., Halstead, N.T., McMahon, T.A., Johnson, S.A., Boughton, R.K. &  
436 Martin, L.B. (2013) Early-life exposure to a herbicide has enduring effects on pathogen-  
437 induced mortality. *Proceedings of the Royal Society B: Biological Sciences*, **280**, 1–8.
- 438 Rohr, J.R., Raffel, T.R., Sessions, S.K. & Hudson, P.J. (2008a) Understanding the net effects of  
439 pesticides on amphibian trematode infections. *Ecological Applications*, **18**, 1743–1753.
- 440 Rohr, J.R., Sager, T., Sesterhenn, T.M. & Palmer, B.D. (2006) Exposure, postexposure, and  
441 density-mediated effects of atrazine on amphibians: Breaking down net effects into their  
442 parts. *Environmental Health Perspectives*, **114**, 46–50.
- 443 Rohr, J.R., Schotthoefer, A.M., Raffel, T.R., Carrick, H.J., Halstead, N., Hoverman, J.T.,  
444 Johnson, C.M., Johnson, L.B., Lieske, C., Piwoni, M.D., Schoff, P.K. & Beasley, V.R.

- 445 (2008b) Agrochemicals increase trematode infections in a declining amphibian species.  
446 *Nature*, **455**, 1235–1239.
- 447 Schäfer, R.B., Caquet, T., Siimes, K., Mueller, R., Lagadic, L. & Liess, M. (2007) Effects of  
448 pesticides on community structure and ecosystem functions in agricultural streams of three  
449 biogeographical regions in Europe. *Science of the Total Environment*, **382**, 272–285.
- 450 Skerratt, L.F., Berger, L., Speare, R., Cashins, S., McDonald, K.R., Phillott, A.D., Hines, H.B. &  
451 Kenyon, N. (2007) Spread of chytridiomycosis has caused the rapid global decline and  
452 extinction of frogs. *EcoHealth*, **4**, 125–134.
- 453 Talley, B.L., Muletz, C.R., Vredenburg, V.T., Fleischer, R.C. & Lips, K.R. (2015) A century of  
454 *Batrachochytrium dendrobatidis* in Illinois amphibians (1888-1989). *Biological*  
455 *Conservation*, **182**, 254–261.
- 456 Thelin, G.P. & Stone, W.W. (2013) *Estimation of annual agricultural pesticide use for counties*  
457 *of the conterminous United States, 1992–2009*: U.S. Geological Survey Scientific  
458 Investigations Report 2013-5009, 54p.
- 459 Voyles, J., Rosenblum, E.B. & Berger, L. (2011) Interactions between *Batrachochytrium*  
460 *dendrobatidis* and its amphibian hosts: A review of pathogenesis and immunity. *Microbes*  
461 *and Infection*, **13**, 25–32.
- 462 Wise, R.S., Rumschlag, S.L. & Boone, M.D. (2014) Effects of amphibian chytrid fungus  
463 exposure on American toads in the presence of an insecticide. *Environmental Toxicology*  
464 *and Chemistry*, **33**, 2541–2544.
- 465

466 Table 1. Model averaged coefficients, standard error (SE), z-statistics and associated *p*-values  
 467 with statistical shrinkage from multimodel inference analyses predicting the effects of total  
 468 pesticide use and pesticide use by type on Bd prevalence in amphibian populations.

| Variable                              | Coefficient | SE     | z    | <i>p</i>         |
|---------------------------------------|-------------|--------|------|------------------|
| <b>Total Pesticide Use</b>            |             |        |      |                  |
| (Intercept)                           | 1.0968      | 0.2776 | 3.93 | <b>&lt;0.001</b> |
| Pesticides                            | -0.0811     | 0.0238 | 3.38 | <b>0.001</b>     |
| Life Stage (Terrestrial)              | -1.2164     | 0.3135 | 3.86 | <b>&lt;0.001</b> |
| Family (Hylidae)                      | -0.1427     | 0.0931 | 1.52 | 0.128            |
| Family (Plethodontidae)               | -0.2146     | 0.0947 | 2.25 | <b>0.024</b>     |
| Family (Ranidae)                      | 0.0145      | 0.0808 | 0.18 | 0.858            |
| Family (Salamandridae)                | 0.1392      | 0.1573 | 0.88 | 0.379            |
| NDVI                                  | -0.0811     | 0.1105 | 0.73 | 0.464            |
| PC1Precip.                            | 0.0016      | 0.0051 | 0.30 | 0.761            |
| PC1Temp.                              | -0.0592     | 0.0453 | 1.30 | 0.193            |
| Pesticides*Life Stage (Terrestrial)   | 0.1396      | 0.0293 | 4.74 | <b>&lt;0.001</b> |
| <b>Type of Pesticide Use</b>          |             |        |      |                  |
| (Intercept)                           | 0.9807      | 0.2510 | 3.88 | <b>&lt;0.001</b> |
| Herbicides                            | -0.0704     | 0.0245 | 2.86 | <b>0.004</b>     |
| Insecticides                          | -0.0007     | 0.0173 | 0.04 | 0.970            |
| Fungicides                            | -0.0033     | 0.0127 | 0.26 | 0.797            |
| Life Stage (Terrestrial)              | -1.1068     | 0.3041 | 3.62 | <b>&lt;0.001</b> |
| Family (Hylidae)                      | -0.1338     | 0.0951 | 1.40 | 0.162            |
| Family (Plethodontidae)               | -0.2262     | 0.1023 | 2.20 | <b>0.028</b>     |
| Family (Ranidae)                      | -0.0070     | 0.0813 | 0.09 | 0.932            |
| Family (Salamandridae)                | 0.0937      | 0.1565 | 0.60 | 0.552            |
| NDVI                                  | -0.0504     | 0.0931 | 0.54 | 0.590            |
| PC1Precip.                            | 0.0011      | 0.0047 | 0.24 | 0.813            |
| PC1Temp.                              | -0.0469     | 0.0442 | 1.06 | 0.290            |
| Herbicides*Life Stage(Terrestrial)    | 0.1315      | 0.0332 | 3.94 | <b>&lt;0.001</b> |
| Insecticides*Life Stage (Terrestrial) | 0.0019      | 0.0172 | 0.11 | 0.912            |
| Fungicides*Life Stage (Terrestrial)   | 0.0017      | 0.0109 | 0.16 | 0.875            |

469

470 Table 2. Model comparison results for models with  $\Delta AICc$  values less than 2 testing predictors  
 471 including total pesticides and types of pesticides.

| Models Including Total Pesticide Use                                                       | AICc   | $\Delta AICc$ | w    |
|--------------------------------------------------------------------------------------------|--------|---------------|------|
| Family + Life Stage + Pesticides + NDVI + PC1Temp + Pesticides*Life Stage                  | 192.21 | 0             | 0.28 |
| Family + Life Stage + Pesticides + PC1Temp + Pesticides*Life Stage                         | 192.48 | 0.27          | 0.24 |
| Family + Life Stage + Pesticides + NDVI + PC1Temp. + PC1Precip. +<br>Pesticides*Life Stage | 193.47 | 1.26          | 0.15 |
| Family + Life Stage + Pesticides + PC1Temp. + PC1Precip. + Pesticides*Life Stage           | 194.05 | 1.84          | 0.11 |
| Models Including Types of Pesticides                                                       |        |               |      |
| Family + Life Stage + Herbicides + PC1Temp. + Herbicides*Life Stage                        | 193.77 | 0             | 0.12 |
| Family + Life Stage + Herbicides + NDVI + PC1Temp. + Herbicides*Life Stage                 | 194.34 | 0.57          | 0.09 |
| Family + Life Stage + Herbicides + Herbicides*Life Stage                                   | 194.92 | 1.16          | 0.07 |
| Family + Life Stage + Herbicides + PC1Precip. + PC1Temp. + Herbicides*Life<br>Stage        | 195.45 | 1.68          | 0.05 |
| Family + Life Stage + Herbicides + Fungicides + PC1Temp. + Herbicides*Life Stage           | 195.67 | 1.91          | 0.05 |
| Family + Life Stage + Herbicides + NDVI + PC1Precip. + PC1Temp. +<br>Herbicides*Life Stage | 195.74 | 1.98          | 0.04 |

472

473



474 **Fig. 1.** Relative importance of factors included in model comparisons evaluating the influence of  
475 A) total pesticide use across host life stages and B) herbicide, insecticide, and fungicide use  
476 across host life stages and model covariates (family, NDVI, precipitation, and temperature). Stars  
477 indicate significance of the factor ( $p < 0.05$ ) from model averaging.

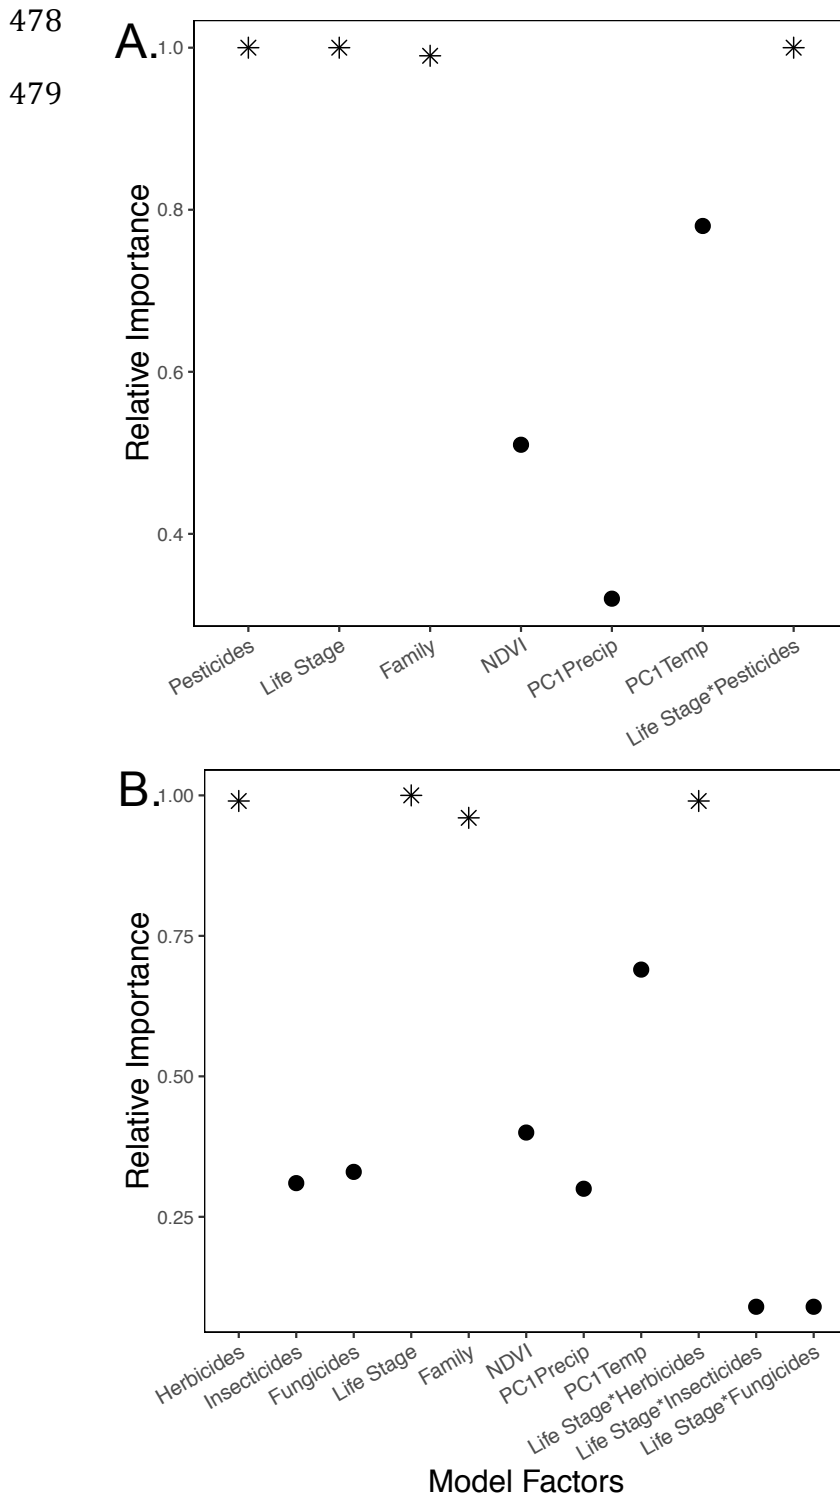

480 **Fig. 2.** Partial regressions showing A) the influence of total pesticide use on *Batrachochytrium*  
481 *dendrobatidis* infection prevalence in amphibian populations across aquatic and terrestrial  
482 amphibian life stages controlling for effects of host family, NDVI, and temperature and B) the  
483 influence of herbicide use on *Batrachochytrium dendrobatidis* infection prevalence in amphibian  
484 populations across aquatic and terrestrial life stages controlling for effects of host family and  
485 temperature. Models shown are the models with a  $\Delta AICc$  equal to zero from model comparisons.  
486 Prevalence has not been transformed. Gray bands represent 95% confidence intervals.

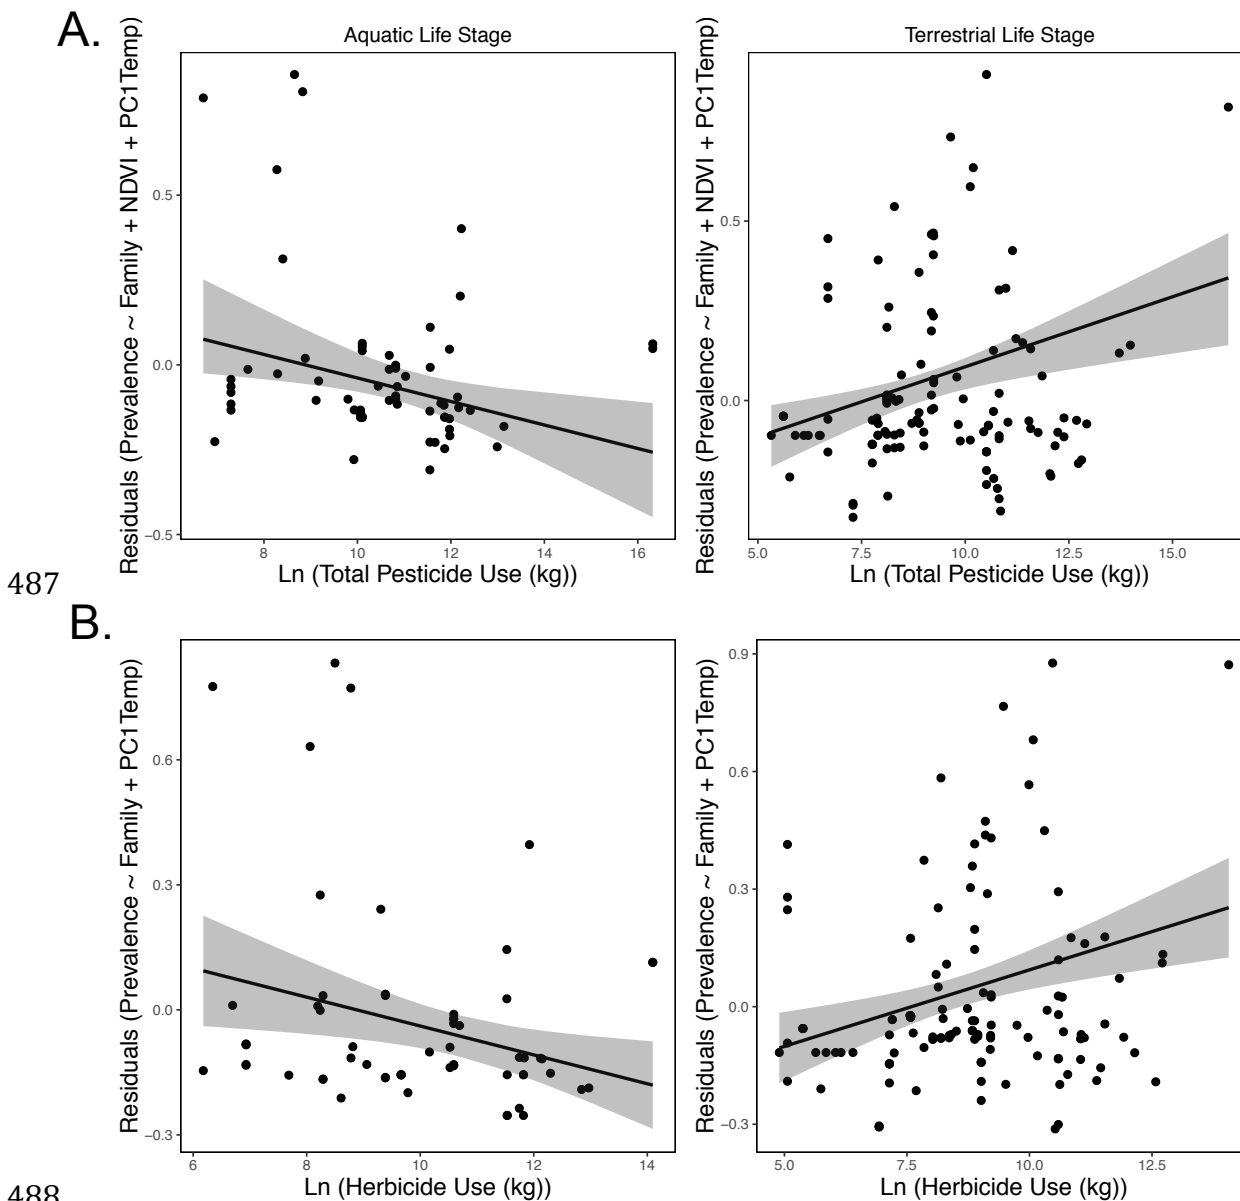

488

489 **Fig. 3.** Partial regressions showing the influence of A) glyphosate use, B) atrazine use, C)  
490 metolachlor-s use, D) ethephon use, E) sodium chlorate use, and F) the sum of these top five  
491 herbicide compounds across life stages on Bd infection prevalence in amphibian populations  
492 controlling for the effects of family, herbicide use (minus the compound or group of focus),  
493 insecticide use, fungicide use, and temperature. Prevalence has not been transformed. Gray bands  
494 represent 95% confidence intervals.

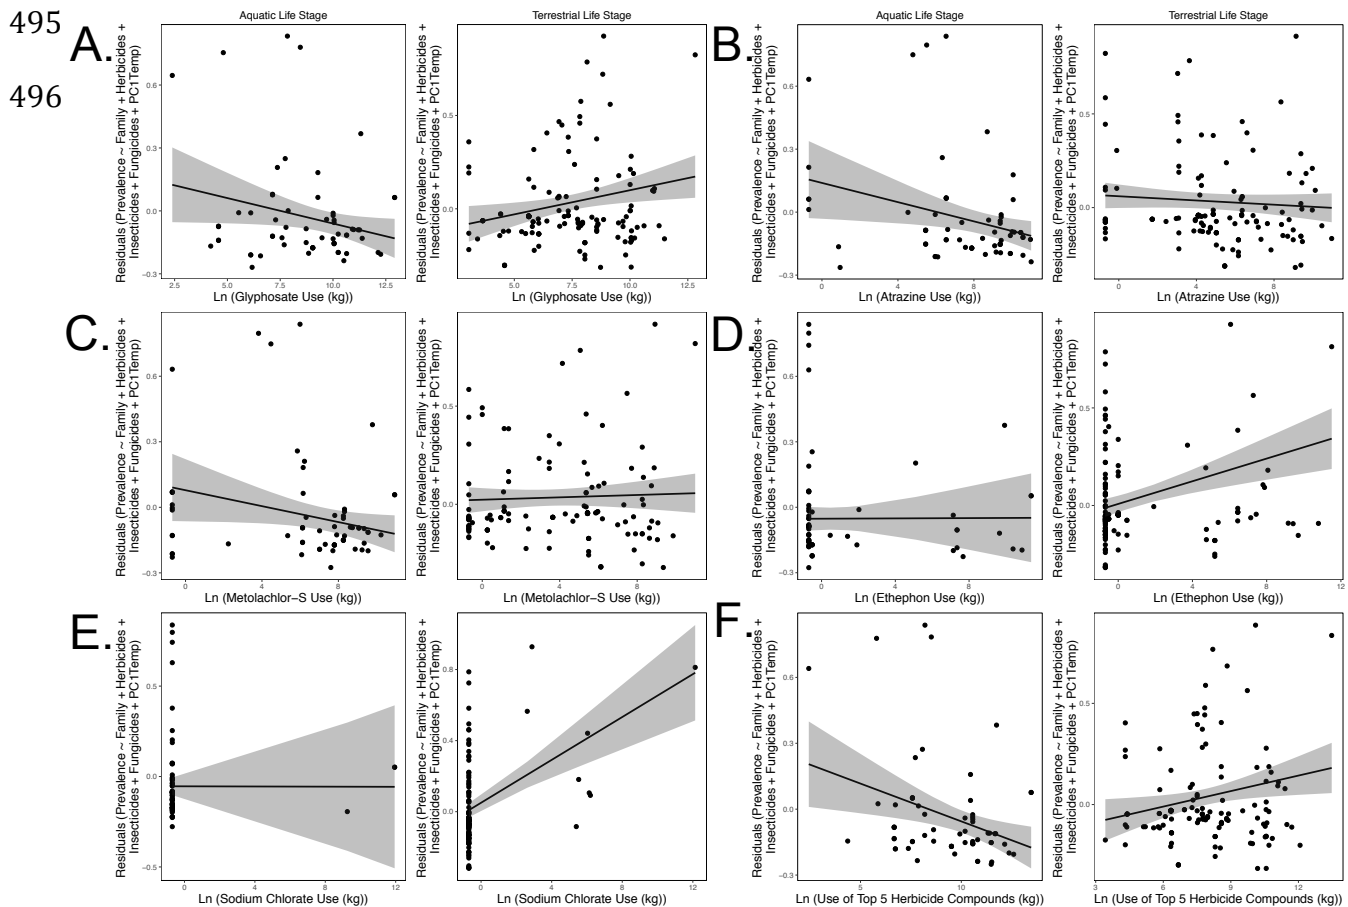

Source: https://www.biorxiv.org/content/10.1101/165779v1.full.pdf
